# Supplementary material
Source: PubMed Central journal article supplement (PMC5491210)
Supplement: NIHMS869588-supplement-supplement_1.pdf [file NIHMS869588-supplement-supplement_1.pdf]

# Sasaki et. al., Supplementary Figure 1

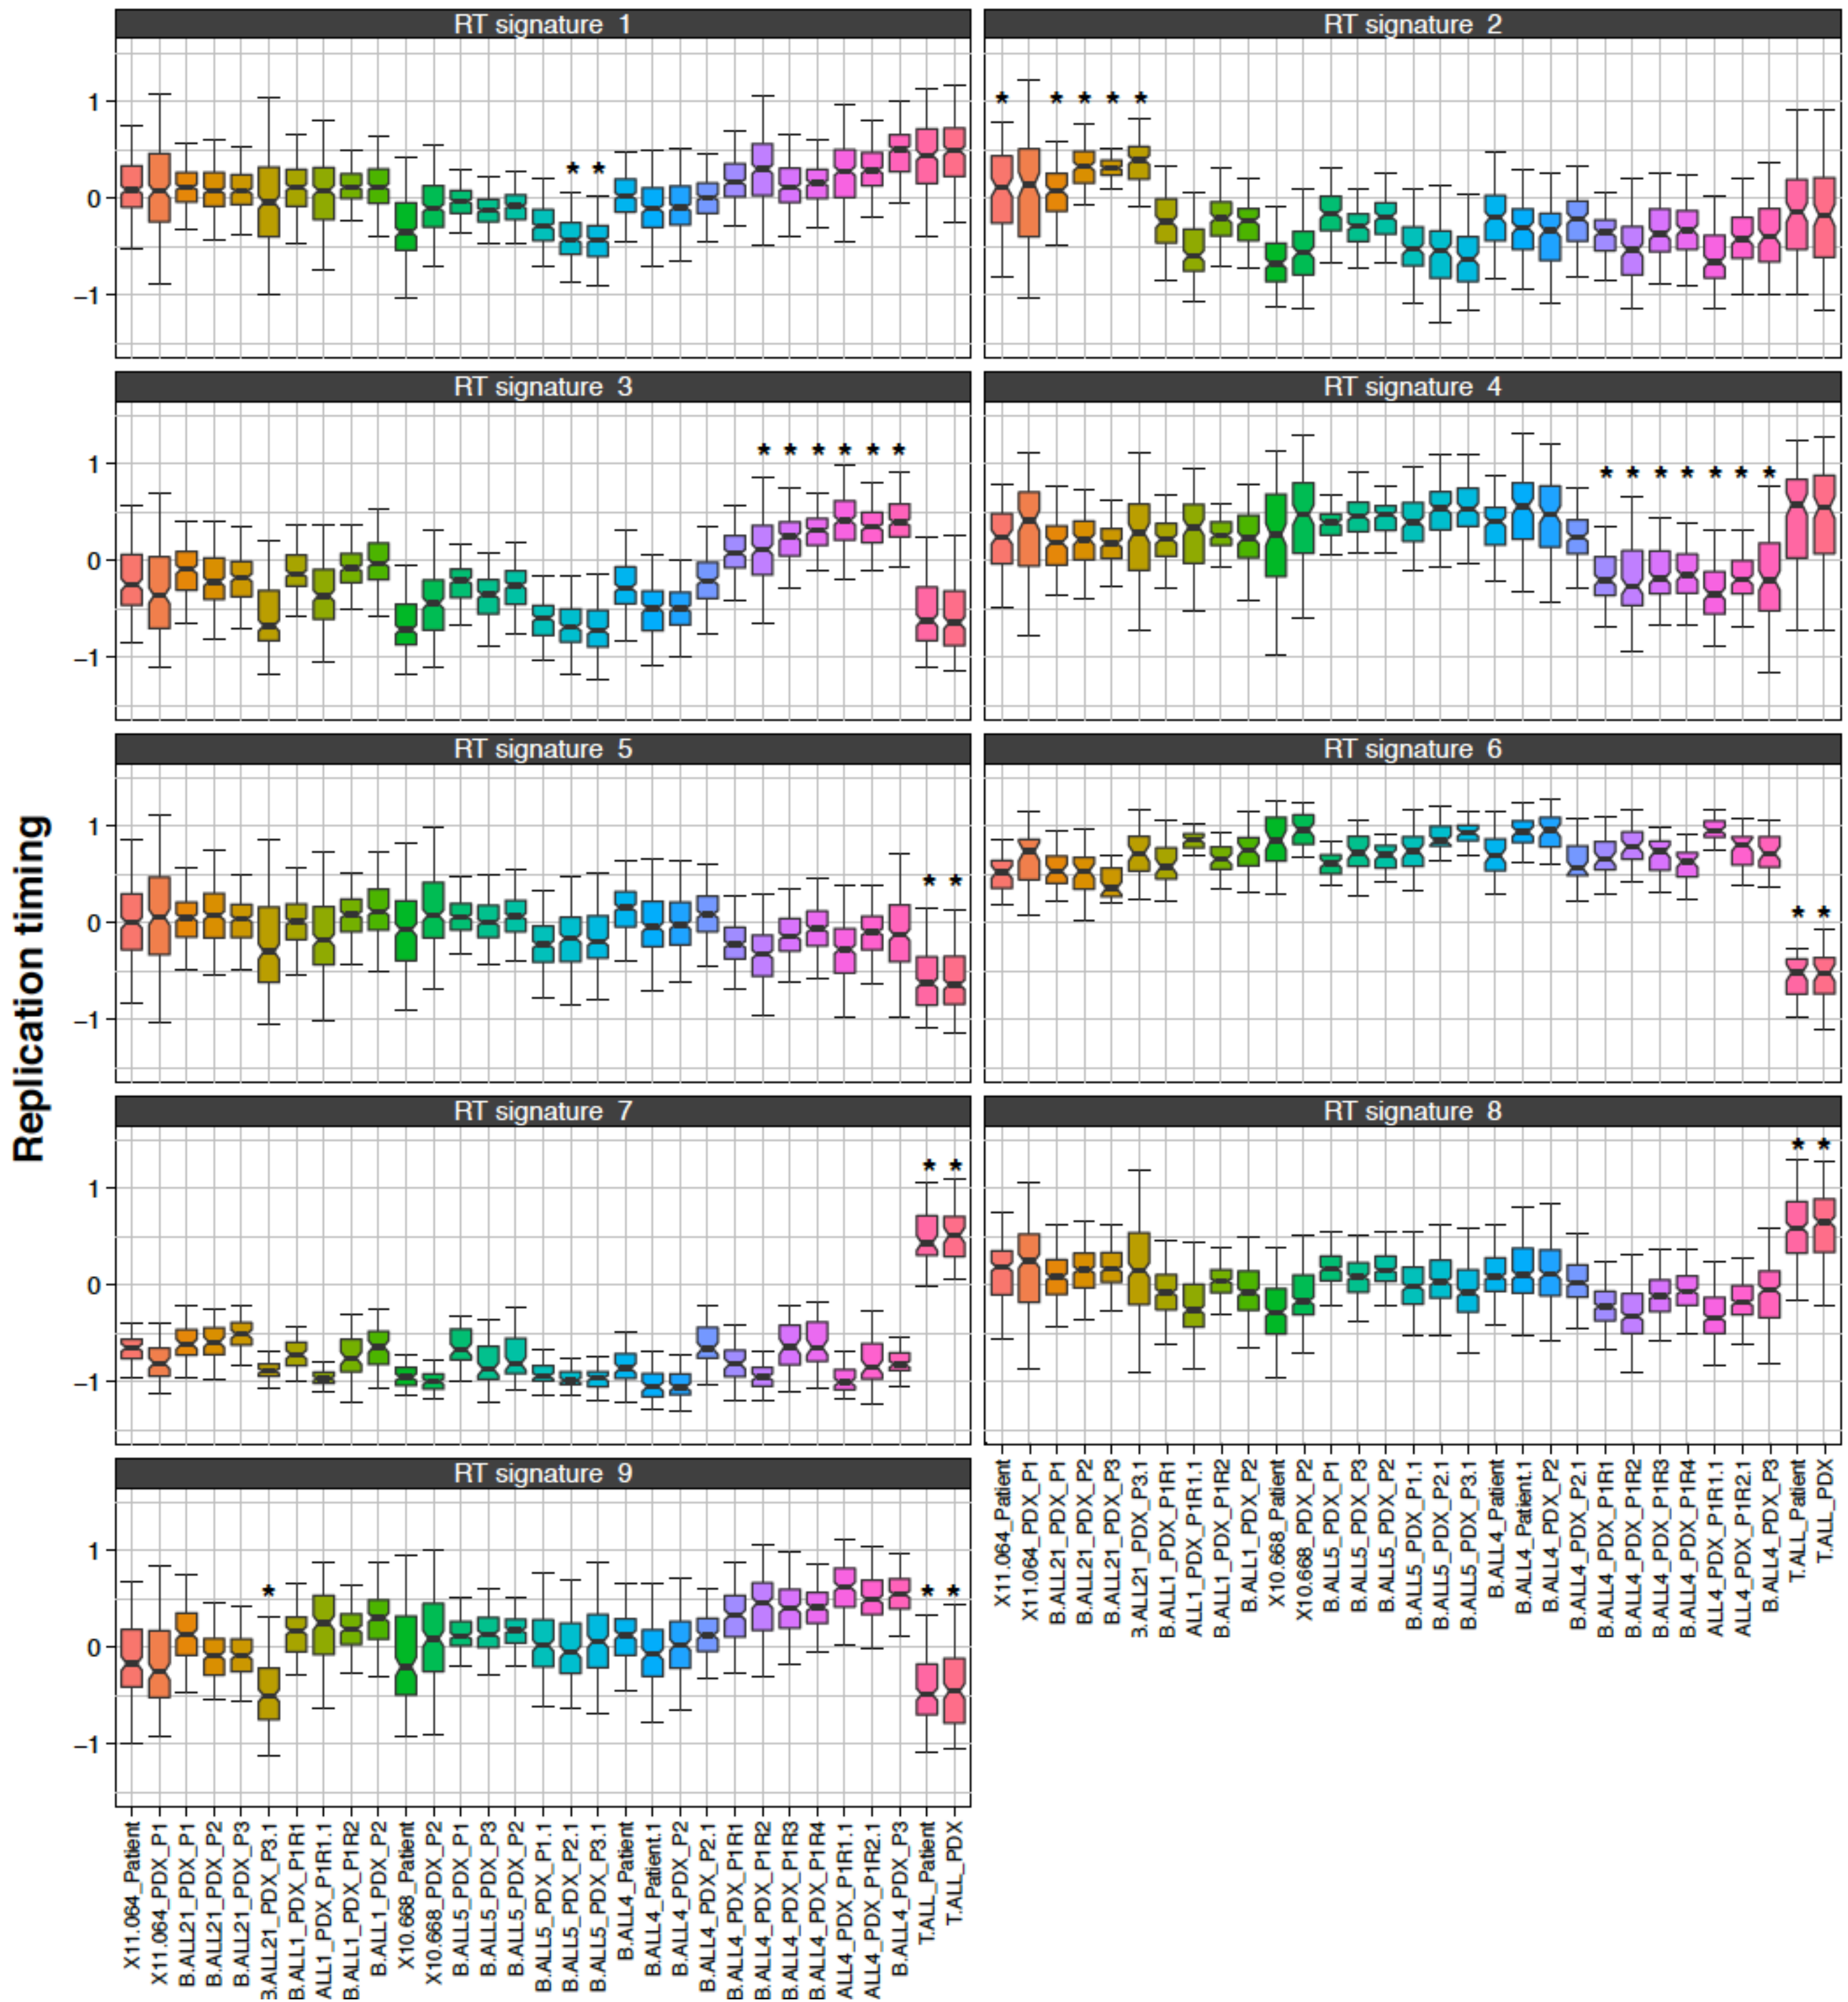

**Figure S1. Statistical significance of RT signatures between B- and T-ALL samples.** Box plots of the RT values for all features within each signature shown in Figure 3. Pairwise T-test with bonferroni correction was performed for each pair of datasets (patient or PDX samples) for each signature. Asterixes show samples that differ from the rest with a p-value <  $2 \times 10^{-16}$  in pairwise comparisons.

## Sasaki et. al., Supplementary Figure 2

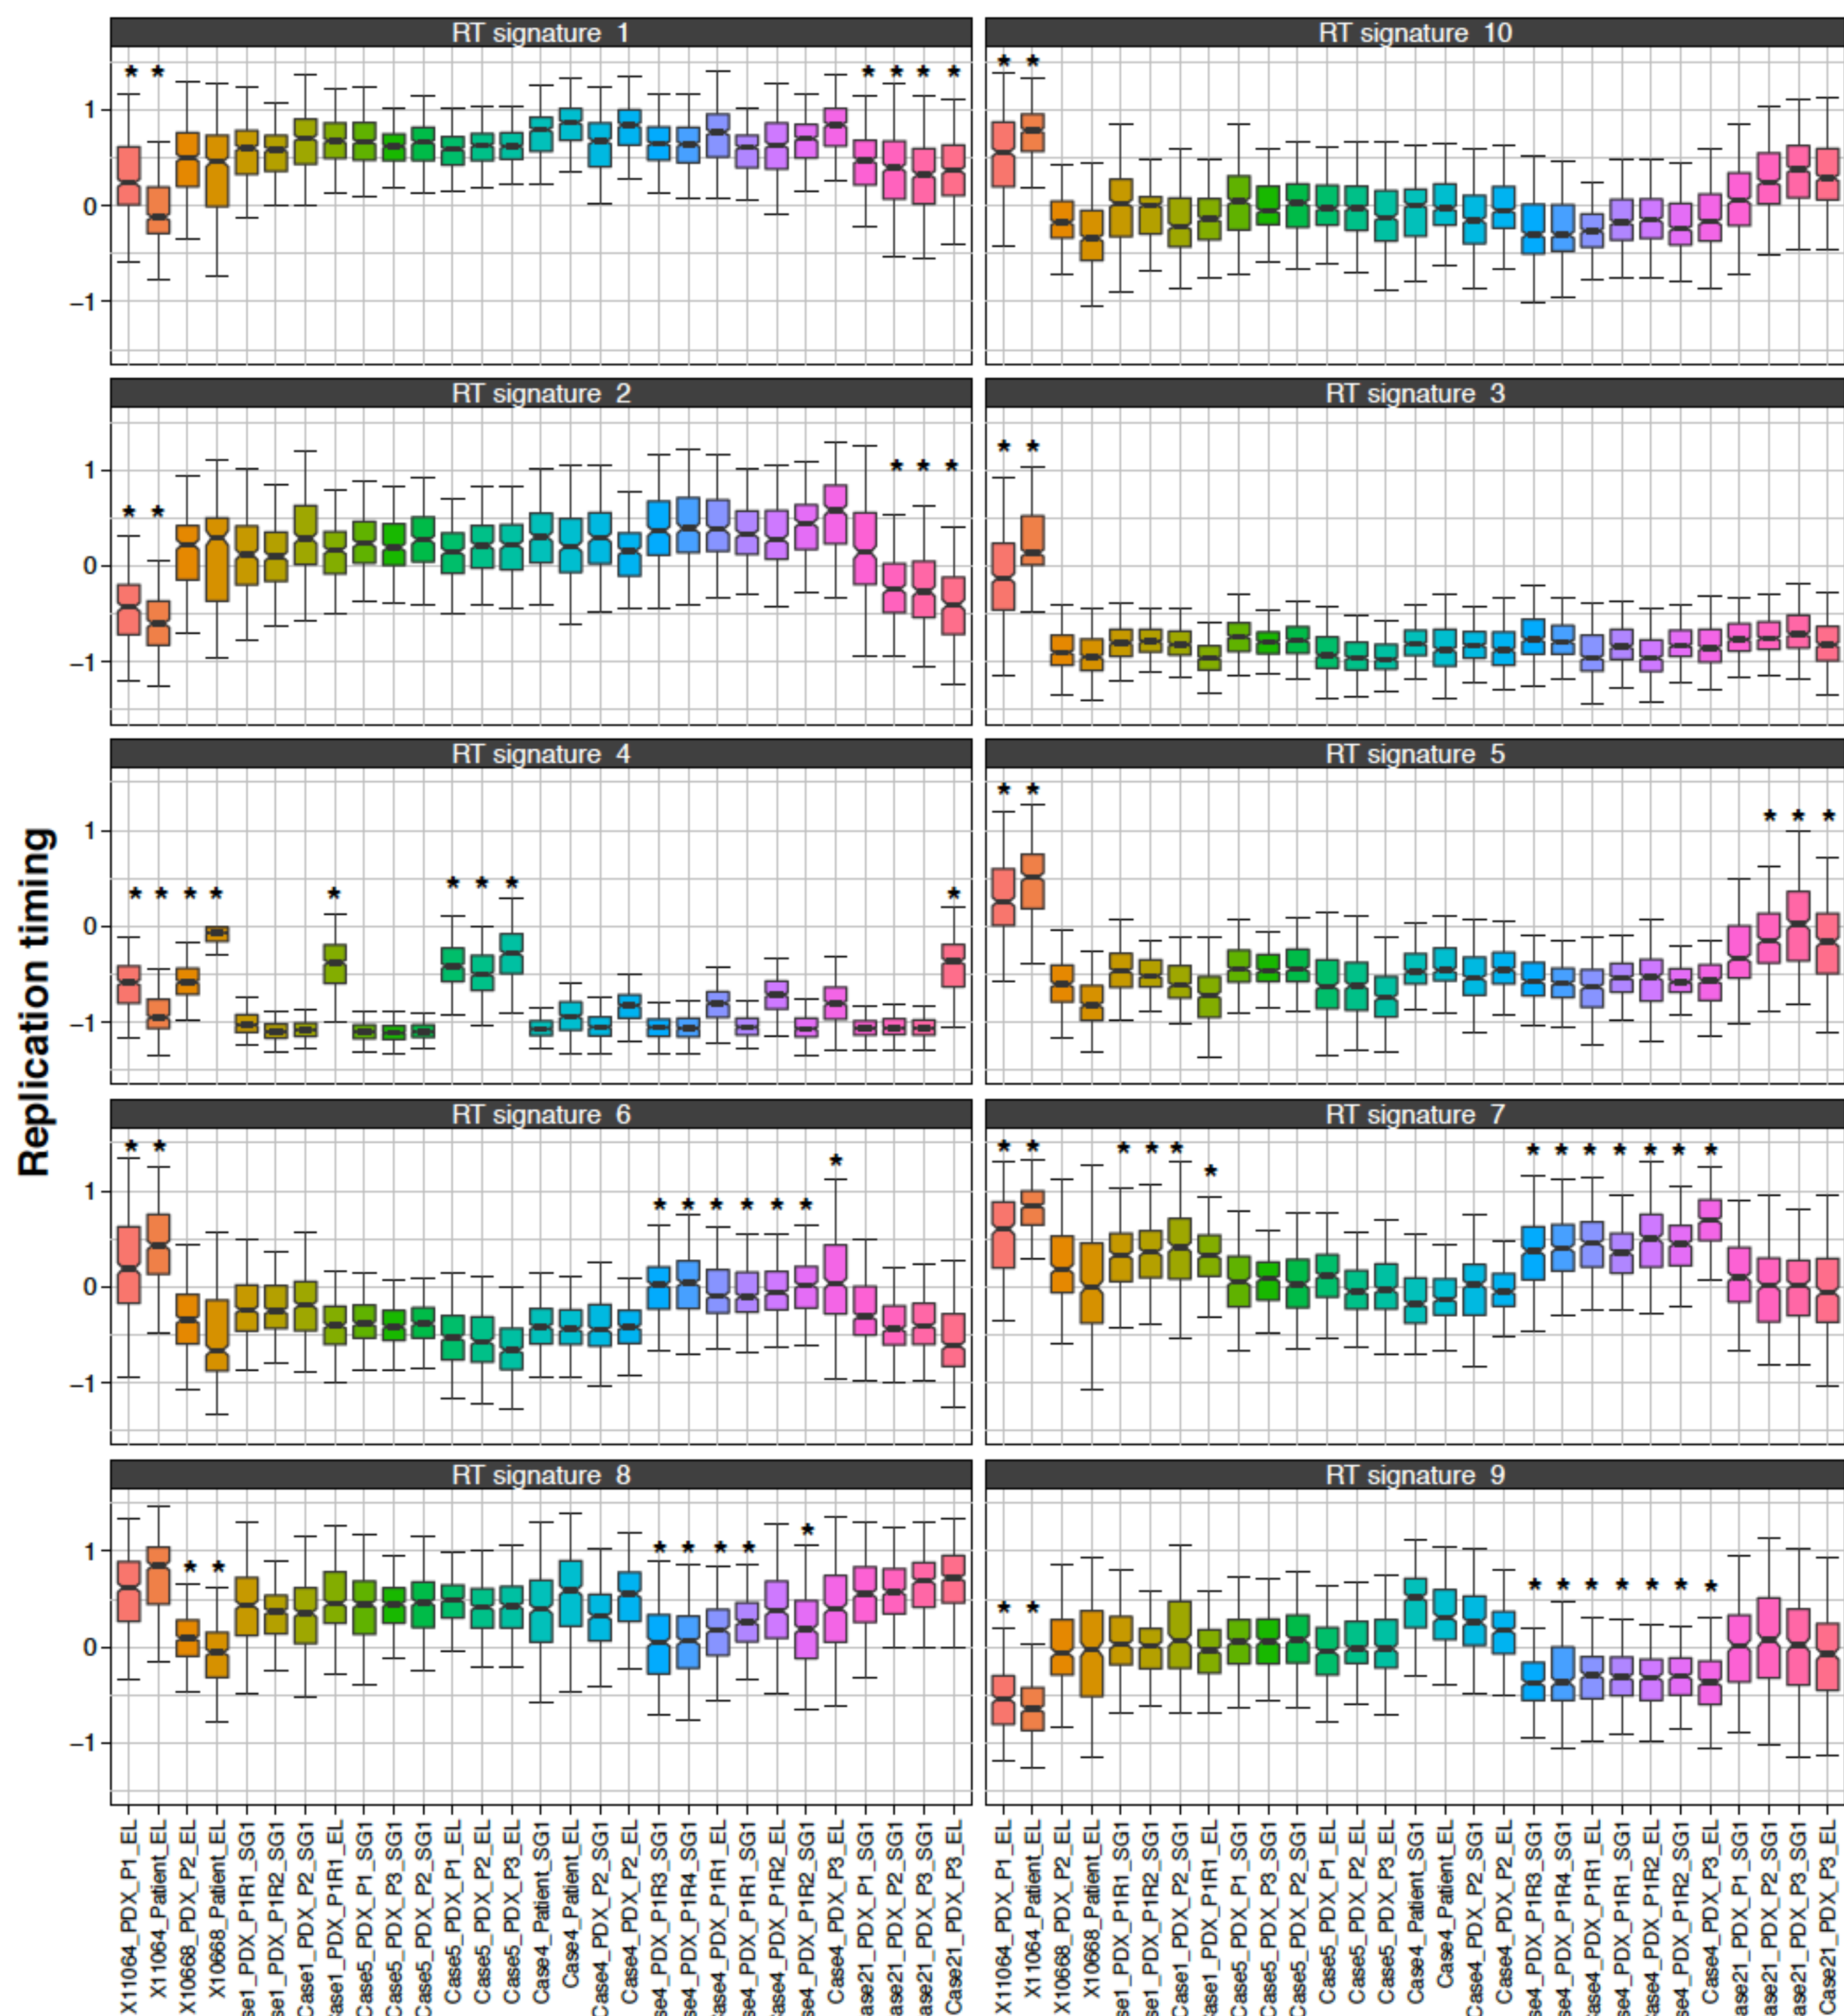

**Figure S2. Statistical significance of RT signatures between B-ALL samples.** Box plots of the RT values for all features within each signature shown in Figure 4. Pairwise T-test with bonferroni correction was performed for each pair of datasets (patient or PDX samples) for each signature. Asterixes show samples that differ from the rest with a p-value <  $2 \times 10^{-16}$  in pairwise comparisons.

## Sasaki et. al., Supplementary Table 1

| patient/case ID | graft?    | fresh or frozen | BrdU label          | sorting | platform  |
|-----------------|-----------|-----------------|---------------------|---------|-----------|
| B-ALL #1        | passage 1 | no info         | in vitro UMD        | S/G1    | 385K      |
|                 | passage 1 | fresh           | in vivo UMD         | S/G1    | 3x720K    |
|                 | passage 1 | frozen          | in vitro FSU        | E/L     | 3x720K    |
|                 | passage 2 | frozen          | in vitro FSU        | S/G1    | 3x720K    |
| B-ALL #4        | patient   | frozen          | in vitro FSU        | E/L     | 3x720K    |
|                 | patient   | frozen          | in vitro FSU        | S/G1    | 3x720K    |
|                 | passage 1 | frozen          | in vitro UMD        | E/L     | 3x720K    |
|                 | passage 1 | fresh           | in vitro UMD        | E/L     | 3x720K    |
|                 | passage 1 | fresh           | in vivo UMD mouse 1 | S/G1    | 3x720K    |
|                 | passage 1 | fresh           | in vivo UMD mouse 2 | S/G1    | 3x720K    |
|                 | passage 1 | fresh           | in vitro UMD        | S/G1    | 3x720K    |
|                 | passage 1 | frozen          | in vitro UMD        | S/G1    | 3x720K    |
|                 | passage 2 | frozen          | in vitro FSU        | E/L     | repli-seq |
|                 | passage 2 | frozen          | in vitro FSU        | S/G1    | 3x720K    |
|                 | passage 3 | frozen          | in vitro FSU        | E/L     | repli-seq |
| B-ALL #5        | passage 1 | frozen          | in vitro FSU        | S/G1    | 3x720K    |
|                 | passage 1 | frozen          | in vitro FSU        | E/L     | 3x720K    |
|                 | passage 2 | frozen          | in vitro FSU        | S/G1    | 3x720K    |
|                 | passage 2 | frozen          | in vitro FSU        | E/L     | 3x720K    |
|                 | passage 3 | frozen          | in vitro FSU        | S/G1    | 3x720K    |
|                 | passage 3 | frozen          | in vitro FSU        | E/L     | 3x720K    |
| B-ALL #21       | passage 1 | frozen          | in vitro FSU        | S/G1    | 3x720K    |
|                 | passage 2 | frozen          | in vitro FSU        | S/G1    | 3x720K    |
|                 | passage 3 | frozen          | in vitro FSU        | S/G1    | 3x720K    |
|                 | passage 3 | frozen          | in vitro FSU        | E/L     | 3x720K    |
| 10-668          | patient   | fresh           | in vitro OHSU       | E/L     | ?         |
|                 | passage 2 | fresh           | in vitro FSU        | E/L     | repli-seq |
| 11-064          | patient   | fresh           | in vitro OHSU       | E/L R1  | 3x720K    |
|                 | passage 1 | frozen          | in vitro FSU        | E/L     | repli-seq |
| T-ALL #F1313    | patient   | frozen          | In vitro Terry Fox  | E/L     | repli-seq |
|                 | passage 1 | frozen          | In vitro Terry Fox  | E/L     | repli-seq |
